# Supplementary material
Source: PubMed Central journal article supplement (PMC3335688)
Supplement: SD1.pdf [file SD1.pdf]

SUPPLEMENTAL TABLE 1  
Occupation of study subjects\*

| Grade | CAD- (%) | CAD+ (%) |
|-------|----------|----------|
| I     | 26.2     | 24.8     |
| II    | 4.6      | 3.9      |
| III   | 5.9      | 6.4      |
| IV    | 0        | 0        |
| V     | 0        | 0        |
| VI    | 5.4      | 6.7      |
| VII   | 35.6     | 34.1     |
| VIII  | 0        | 0        |
| IX    | 22.3     | 24.1     |

I. Professional/executive/manager/big business

II. Clerical/medium business

III. Sales

IV. Agriculture/self used

V. Household and domestic

VI. Services

VII. Skilled manual

VIII. Unskilled manual

IX. Do not work/unemployed

\*The occupation of the study subjects were collected as part of the Chennai Urban Rural Epidemiological Study (CURES) questionnaire.

## OCCUPATION (CATEGORY)

### I. Professional/executive/manager/big business.

1. Physical scientists
2. Architects, engineers, technologists, and surveyors
3. Engineering technicians
4. Aircraft and ships officers
5. Life scientists
6. Life science technicians
7. Physicians and surgeons
8. Nursing and other medical and health technicians
9. Scientific, medical and technical persons, other
10. Mathematicians, statisticians, and related workers
11. Economists and related workers
12. Accountants, auditors, and related workers
13. Social scientists and related workers
14. Jurists
15. Teachers
16. Poets, authors, journalists, and related workers
17. Sculptors, painters, photographers, other creative artists
18. Composers and performing artists
19. Professional workers
20. Elected and legislative officials
21. Administrators, officials' government, and local bodies
22. Proprietors, directors and managers, wholesale, retail trade
23. Directors and managers, financial institutions
24. Proprietors, directors, manufacturing managers, and related
25. Proprietors, directors, managers, transport, communication
26. Working proprietors, directors and managers, other services
27. Administrative, executive, and managerial workers
28. Computing machine operators
29. Transport and communication supervisors
30. Manufacturers, agents
31. Hotel and restaurant keepers

### II. Clerical/medium business

1. Clerical and other supervisors
2. Stenographers, typist, and card and tape punching operators
3. Book keepers, cashiers, and related workers
4. Clerical and related workers

### III. Sales

1. Merchants and shopkeepers, wholesale and retail trade

2. Technical salesmen and commercial travelers
3. Salesmen, shop assistants, and related workers
4. Insurance, real estate, securities, salesmen, auctioneers
5. Money lenders and pawn brokers
6. Sales workers

### IV. Agriculture/self used

1. Farm plantation, dairy and other managers and supervisors
2. Cultivators
3. Farmers other than cultivators
4. Agricultural laborers
5. Plantation laborers and related workers
6. Other farm workers
7. Forestry workers
8. Hunters and related workers
9. Fishermen and related workers

### V. Household and domestic

1. House keepers, matrons, and stewards
2. Maids and other housekeeping service workers

### VI. Services

1. Village officials
2. Transport conductors and guards
3. Mail distributors and related workers
4. Telephone and telegraph operators
5. Cooks, waiters, bartenders, and related workers
6. Building caretakers, sweepers, cleaners, and related workers
7. Protective service workers
8. Service workers

### VII. Skilled manual

1. Hair dresser, barbers, beauticians, and related workers
2. Miners, quarrymen, well drillers, and related workers
3. Metal processors
4. Wood preparation workers and paper makers
5. Chemical processors and related workers
6. Spinners, weavers, knitters, dyers, and related workers
7. Tanners, fellmonger, and pelt dressers
8. Food and beverage processors
9. Tobacco prepares and tobacco product makers
10. Tailors, dress makers, sewers, upholsterers, and related
11. Shoemakers and leather goods makers
12. Carpenters, cabinet, and related workers
13. Stone cutter and carvers
14. Blacksmiths, tool makers, and machine tool operators
15. Machinery fitters, assemblers, precision instrument makers
16. Electrical fitters and related electrical electronic workers
17. Broadcasting and sound equipment operators, projectionists
18. Plumbers, welders, sheet metal, and structural metal
19. Jewelry and precious metal workers and metal engravers
20. Glass formers, potters, and related workers
21. Rubber and plastic products makers
22. Paper products makers, printing, and related workers
23. Painters, production, and other construction workers
24. Stationery engines and related equipment operators
25. Transport equipment operators

### VIII. Unskilled manual

1. Launderers, dry-cleaners, and pressers
2. Laborers

### IX. Do not work/unemployed

- None including housewives, students, unemployed, and retired
